# Supplementary material for: Theoretical insight into the doubly antiaromatic carbon allotrope cyclo[16]carbon
Source: Royal Society of Chemistry journal article supplement (doi:10.1039/d3cp06301a), 2024-01-01
Supplement: d3cp06301a1.pdf [file d3cp06301a1.pdf]

## Supporting Information

Theoretical insight into the doubly antiaromatic carbon allotrope cyclo[16]carbon

Hao Li<sup>a</sup>, Rakesh Parida<sup>a</sup>, Shaul Mukamel<sup>\*b</sup>, and Jin Yong Lee<sup>\*a</sup>

<sup>a</sup>*Department of Chemistry, Sungkyunkwan University, Suwon 440-746, Korea*

<sup>b</sup>*Department of Chemistry, University of California at Irvine, Irvine, CA 92697*

\*Corresponding authors: smukamel@uci.edu (S. Mukamel); jinylee@skku.edu (J. Y. Lee).

**Figure S1.** STM image of constant height mode of the carbon 16 above 0.7 Å of the ring plane with a bias voltage of -3.5 V. A short C-C bond is highlighted by a red arrow. The color scale is given in arbitrary unit.

**Figure S2.** Color-filled contour line of the STM image of the carbon 16 of constant current mode with LDOS = 0.003 au. A short C-C bond is highlighted by a red arrow. The color scale is given in Å.

**Figure S3.** Constant current isosurface corresponding to LDOS = 0.003 au of the carbon 16 with a bias voltage of -3.5 V. A short C-C bond is highlighted by a red arrow.

**Figure S4.** The isosurface of the induced magnetic field for C<sub>16</sub> and C<sub>18</sub>,  $B_z^{ind} = \pm 8$  ppm, alongside a 1D plot illustrating the shielding values relative to the distance on either side of the C<sub>16</sub> ring.

**Table S1** Bond orders of two types of C-C bonds in C<sub>16</sub> obtained using different methods.

**Table S2** Decomposing Mayer bond order of two types of C-C bonds in C<sub>16</sub>

**Table S3** The NICS(0) and NICS<sub>zz</sub>(0) of C<sub>16</sub> at different level of theory.

In the STM simulation, the bias voltage was set to -3.5 V. In this case, electrons flow from the carbon 16 to the STM tip, and two highest occupied MOs (one  $\pi^{\text{in}}$  MOs with energy of -8.019 eV one two  $\pi^{\text{out}}$  MOs with energy of -8.1434 eV) contribute to the tunneling current.

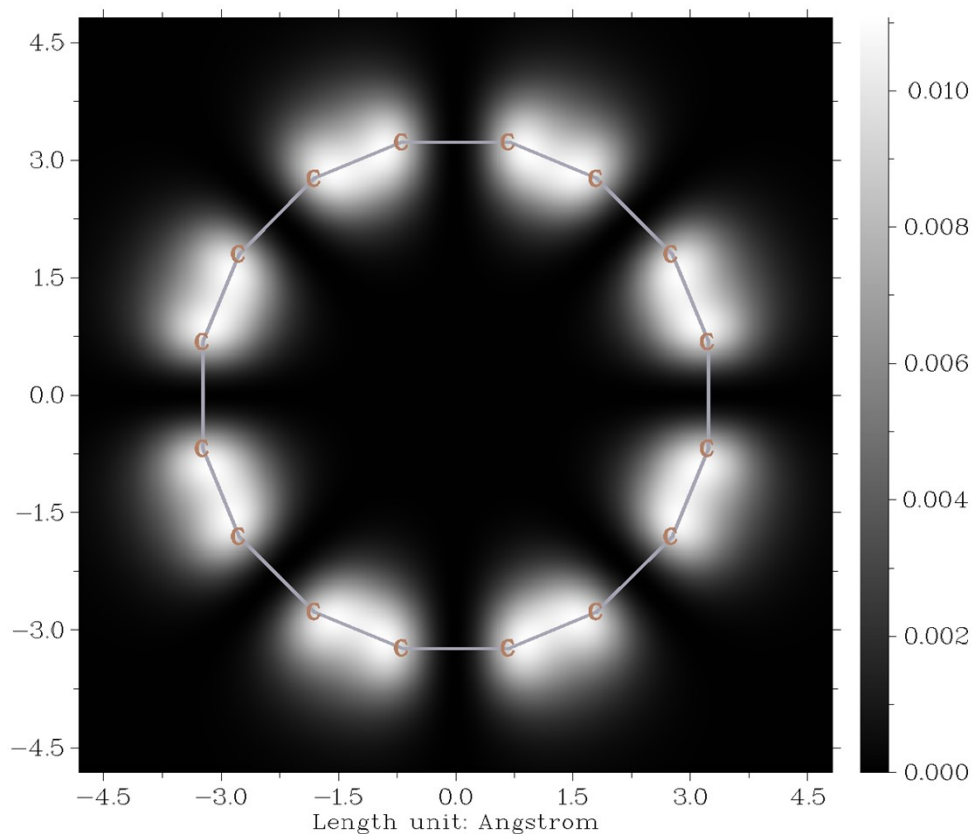

**Figure S1.** STM image of constant height mode of the carbon 16 above 0.7 Å of the ring plane with a bias voltage of -3.5 V. A short C-C bond is highlighted by a red arrow. The color scale is given in arbitrary unit.

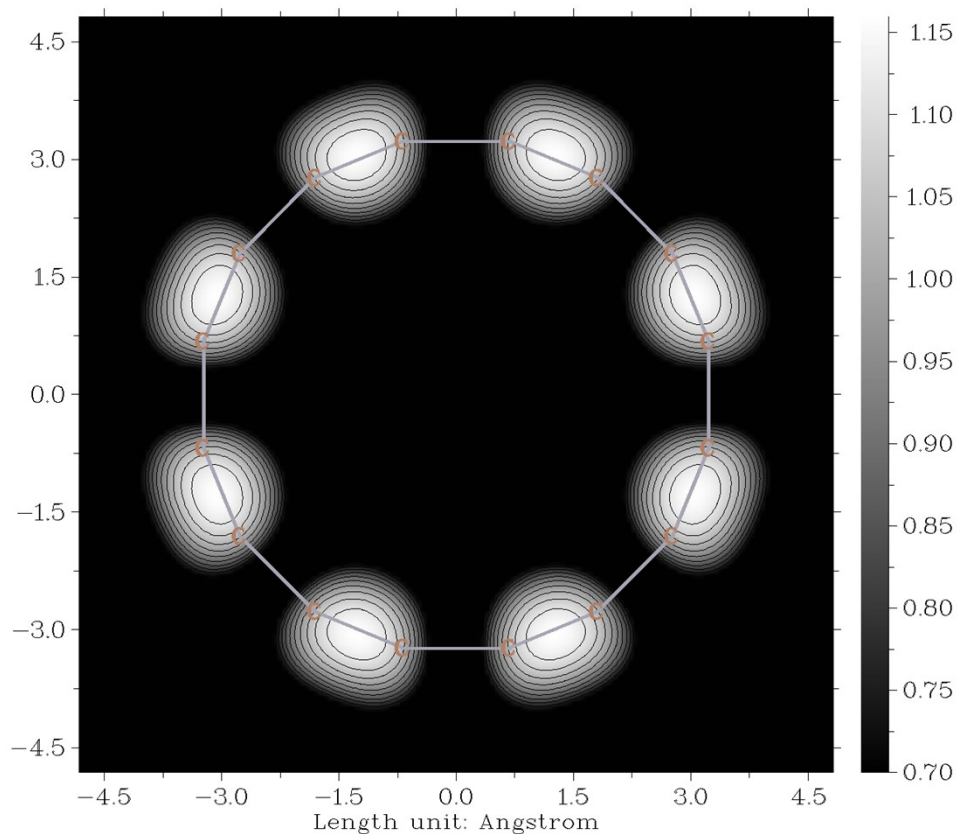

**Figure S2.** Color-filled contour line of the STM image of the carbon 16 of constant current mode with  $\text{LDOS} = 0.003 \text{ au}$ . A short C-C bond is highlighted by a red arrow. The color scale is given in Å.

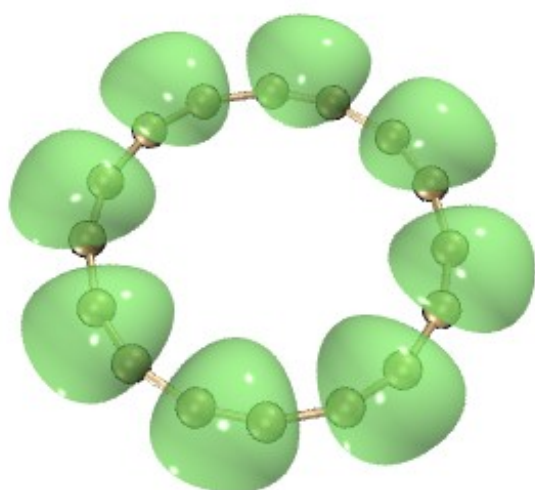

**Figure S3.** Constant current isosurface corresponding to  $\text{LDOS} = 0.003 \text{ au}$  of the carbon 16 with a bias voltage of  $-3.5 \text{ V}$ . A short C-C bond is highlighted by a red arrow.

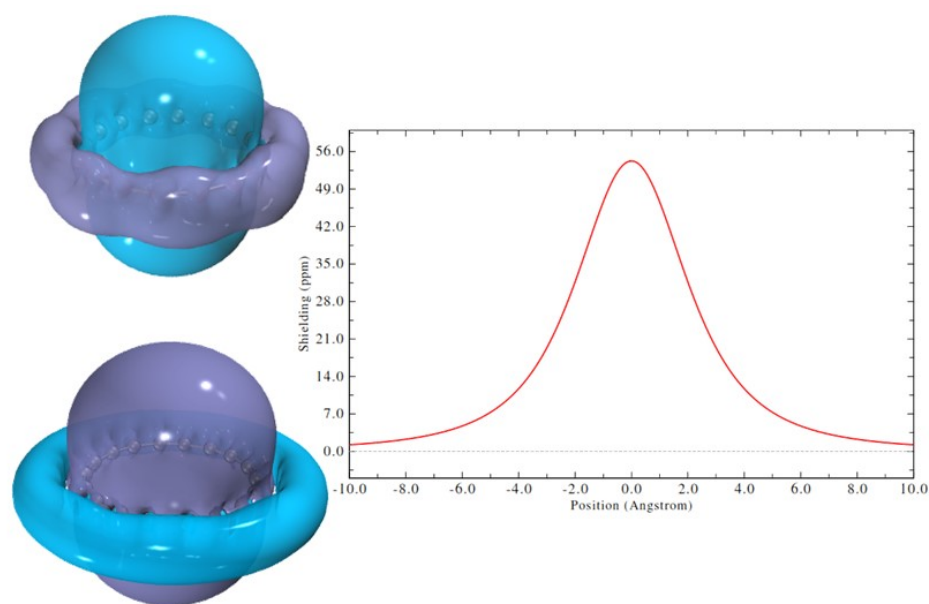

**Figure S4.** The isosurface of the induced magnetic field for  $C_{16}$  and  $C_{18}$ ,  $B_z^{ind} = \pm 8$  ppm, alongside a 1D plot illustrating the shielding values relative to the distance on either side of the  $C_{16}$  ring.

**Table S1** Bond orders of two types of C-C bonds in  $C_{16}$  obtained using different methods.

| bond order                                    | short bond | long bond | diff <sup>a</sup> |
|-----------------------------------------------|------------|-----------|-------------------|
| Mayer bond order                              | 2.674      | 1.173     | 1.501             |
| Fuzzy bond order                              | 2.375      | 1.359     | 1.016             |
| Wiberg bond order (Lowdin <sup>b</sup> based) | 2.452      | 1.449     | 1.003             |
| Wiberg bond order (NAO <sup>c</sup> based)    | 2.481      | 1.234     | 1.247             |
| Laplacian bond order                          | 2.519      | 1.597     | 0.922             |

<sup>a</sup> The bond order difference between two types of C-C bonds.

<sup>b</sup> Lowdin orthogonalization.

<sup>c</sup> Natural atomic orbitals.

**Table S2** Decomposing Mayer bond order of two types of C-C bonds in  $C_{16}$ .

| MO type <sup>a</sup>   | short bond | long bond | diff <sup>b</sup> |
|------------------------|------------|-----------|-------------------|
| $\pi^{\text{in}}$ MOs  | 1.398      | 0.113     | 1.285             |
| $\pi^{\text{out}}$ MOs | 1.388      | 0.154     | 1.234             |
| $\delta$ MOs           | 1.703      | 1.284     | 0.418             |
| sum                    | 4.488      | 1.552     | 2.937             |

<sup>a</sup>The indices of the  $\pi^{\text{in}}$  MOs are 33, 35, 36, 41, 42, 45, 46, and 48. The indices of the  $\pi^{\text{out}}$  are 34, 37, 38, 39, 40, 43, 44, and 47. Other valence of MOs are regarded as  $\delta$  MOs.

<sup>b</sup> The bond order difference between two types of C-C bonds.

**Table S3** The NICS(0) and NICSzz(0) of C<sub>16</sub> at different level of theory.

| Functional | NICS(0) (ppm) | NICSzz(0) (ppm) |
|------------|---------------|-----------------|
| TPSSH      | 28.4          | 90.3            |
| B3LYP      | 25.6          | 81.8            |
| HSE06      | 25.8          | 82.6            |
| PBE0       | 24.7          | 79.1            |
| MN15       | 19.8          | 64.4            |
| BHandHLYP  | 16.7          | 55.3            |
| M06-2X     | 17.9          | 58.7            |
| wB97XD     | 15.8          | 52.2            |
